1 **Antibacterial activity of total flavonoids from *Ilex rotunda***  
2 ***Thunb.* and different antibacterials on different**  
3 **multidrug-resistant bacteria alone or in combination**

4 Yongji Wu, Beibei Chai, Lizhen Wang, Weijia Jiang, Mei Hu, Yuchuan Zhao, Hongbin Si\*

5 *Institute of Animal Science and Technology of Guangxi University, Nanning, Guangxi*  
6 *530004, China*

7 **Keywords:**

8 Antibacterial activity

9 Total flavonoids

10 *Ilex rotunda Thunb.*

11 Multidrug-resistant bacteria

12 Synergistic

13 Additive

14 **ABSTRACT**

15 The problem of bacterial resistance is becoming more and more serious, which  
16 has become an urgent problem to be solved in human and veterinary. One approach to  
17 control and delay bacterial resistance is combination therapy in which antibiotics are  
18 given together with other antimicrobial or non-antimicrobial agents. Studies have  
19 shown that flavonoids from Traditional Chinese medicine (TCM) possess a high level  
20 of antibacterial activity against antibiotic resistant strains. The aim of this study was  
21 to evaluate the antibacterial effects of a combined therapy of total flavonoids from  
22 *Ilex rotunda Thunb.* and antibiotics against seven kinds of veterinary bacteria which  
23 were multidrug resistance bacteria. A microdilution checkerboard method was used to  
24 determine the minimal inhibitory concentrations of both types of antimicrobials, alone  
25 and in combination. The fractional inhibitory concentration index was calculated and

26 used to classify observed collective antibacterial activity as synergistic, additive,  
27 indifferent or antagonistic.

28 From the performed tests, the total flavonoids and antimicrobial agents were  
29 combined to inhibit different multidrug-resistant bacteria, such as *Escherichia coli*,  
30 *Streptococcus*, *Pseudomonas aeruginosa*, *Enterococcus faecalis*, *Proteus vulgaris*,  
31 *Staphylococcus aureus*, *Acinetobacter baumannii*. For these bacteria, total flavonoids  
32 from *Ilex Rotunda Thunb.* presented synergistic or additive with different antibiotics  
33 and had a certain antibacterial effect on the separated multidrug-resistant bacteria. The  
34 study shows total flavonoids from *Ilex rotunda Thunb.* have potential as adjuvants for  
35 the treatment of animal bacterial diseases.

## 36 **1. Introduction**

37 With extensive use and abuse of antibiotics in both human and veterinary  
38 medicine, the problem of rapid spread of bacterial resistance is becoming more and  
39 more serious(Jones, Draghi, Thornsberry, Karlowsky, Sahm & Wenzel, 2004). So it is  
40 more difficult to find an effective drug treatment of animal bacterial diseases, the  
41 increase in dosage, development of drug resistance, drug residues and accumulation in  
42 body surely will do harm to body health, but also damage the ecological  
43 environment(Liu et al., 2017; Miravittles & Anzueto, 2017).

44 China is fortune as it owns rich resources of traditional Chinese Medicine. Novel  
45 antibacterial action of plant extracts or effective bacteriostatic component, such as  
46 flavonoids, berberine, polysaccharides, saponin, volatile oil, etc. have been  
47 documented(Ramezani, Rahmani & Dehestani, 2017;Naz et al., 2017). Few plants  
48 extraction and effective bacteriostatic component exhibited synergistic or additive  
49 interaction with antibiotics against drug-resistant bacteria(Eskandary, Tahmourespour,  
50 Hoodaji & Abdollahi, 2017; Ye et al., 2017). Screening of crude extracts for  
51 synergistic or additive interaction with antibiotics is expected to provide bioactive  
52 compounds to be used in combinational therapy. These compounds may not have  
53 strong antibacterial activity but may enhance the activity of antibiotics synergistically

54 or additively.

55 *Ilex rotunda Thunb.* belongs to the *Ilex* genus, the dried bark or root bark. The  
56 chemical constituents have been isolated from more than 20 kinds, mainly including  
57 three terpenoids, flavonoids, phenols, tannins and so on(Liu, Peng, Chen, Liu, Liang  
58 & Sun, 2017). The research on antibacterial, anti-inflammation is becoming more and  
59 more popular and accepted. Flavonoids are well-known antimicrobial compound  
60 against some pathogenic microorganisms and have been regard as one of potential  
61 sources of novel antimicrobial agents(Zakaryan, Arabyan, Oo & Zandi, 2017; Kurek,  
62 Nadkowska, Pliszka & Wolska, 2012). Flavonoids used alone or with some  
63 antibacterial drugs combination have certain antibacterial effects, and some antibiotics  
64 combined with antibacterial drugs can reduce the minimum inhibitory concentration  
65 of bacteria and antibiotic resistant strains to increase antibacterial activity(Barbieri et  
66 al., 2017; Usman et al., 2016).

67 In the present study, we evaluated synergistic and additivity effects of antibiotics  
68 administered at doses lower than their minimum inhibitory concentrations (MICs)  
69 with total flavonoids from *Ilex rotunda Thunb.* to test whether it would enhance the  
70 antibacterial activity of antibiotics to veterinary multidrug-resistant bacteria. Potential  
71 synergistic and additive antibacterial effects were quantified by the fractional  
72 inhibitory concentration index (FICI), which was determined using MICs obtained by  
73 the microdilution checkerboard method (Roy-Leon, Lauzon, Toyé, Singhal &  
74 Cameron, 2005).

## 75 **2. Materials and methods**

### 76 *2.1 Preparation of total flavonoids from Ilex rotunda Thunb.*

77 *Ilex rotunda Thunb.* were provided by Guangxi Taihua Pharmaceutical  
78 Corporation. The bark was dried in oven 40°C till constant weight achieved, then  
79 crushed into powder with a size smaller than No.30 mesh. Total flavonoids were  
80 extracted under the extraction conditions that ethanol concentration, 63.71%;

81 solid-liquid ratio, 43.03ml/g; ultrasonic temperature, 54.01 °C and ultrasonic power,  
82 63.25% (443W). The extracts were collected, freeze-dried, ground and then stored at  
83 -20 °C. For experiment purposes flavonoids extract was reconstituted in 5% dimethyl  
84 sulfoxide (DMSO) to a final concentration of 320mg/ml.

## 85 2.2 Antimicrobial agents

86 Amikacin, colistin, meropenem, sulfamonomethoxine, amoxicillin, mequindox,  
87 ceftriaxone sodium, cefotaxime sodium, ceftiofur sodium, ceftazidime, lincomycin,  
88 florfenicol, fosfomicin, rifampicin were obtained from Sigma-Aldrich (Shanghai).  
89 Amikacin, colistin, meropenem were prepared in sterile distilled water. Amoxicillin  
90 was dissolved in phosphate e buffer (PH=6.0, 0.01mol/L). Azithromycin was prepared  
91 in 95% ethanol and dissolved in broth. Ceftazidime was dissolved in sodium  
92 carbonate solution (NaCO<sub>3</sub>, the amount of anhydrous sodium carbonate is ten percent  
93 of ceftazidime). Rifampicin was dissolved in dimethyl sulfoxide (DMSO, final  
94 concentrations ranging from 0.0002% to 0.0003%). Sulfamonomethoxine was first  
95 dissolved in half of total volume hot water added a small amount of sodium hydroxide  
96 and then diluted with sterile distilled water to the working concentration.

## 97 2.3 Bacterial strains and growth conditions

98 *Escherichia coli*, *Streptococcus*, *Pseudomonas aeruginosa*, *Enterococcus*  
99 *faecalis*, *Proteus vulgaris*, *Staphylococcus aureus*, *Acinetobacter baumannii* were all  
100 obtained from the Chinese Veterinary Laboratory at Guangxi University (Nanning,  
101 China). The cultures were preserved at -20 °C with 50% (v/v) glycerin solution at a  
102 ratio of 1:1 before use. Working cultures of 7 kinds bacterial were prepared from  
103 frozen stocks by 3 sequential transfers in 10ml liquid media (CAMHB for *Escherichia*  
104 *coli*, *Pseudomonas aeruginosa*, *Enterococcus faecalis*, *Proteus vulgaris*,  
105 *Staphylococcus aureus*, *Acinetobacter baumannii*, CAMHB was supplemented with  
106 2.5%~5.0% LHB for *Streptococcus*).

## 107 2.4 Experiment on the evaluation of different combined effects

108 The antibiotic sensitivity of bacterial strains was assessed according to Clinical  
109 Laboratory Standards Institute (CLSI) document M100-S24 (Wayne, 2014). MICs of  
110 antibiotics, flavonoids of *Ilex rotunda Thunb.* and their combinations were determined  
111 using the microdilution checkerboard method. *Escherichia coli*, *Pseudomonas*  
112 *aeruginosa*, *Enterococcus faecalis*, *Proteus vulgaris*, *Staphylococcus aureus*,  
113 *Acinetobacter baumannii* were tested in MH (pH=7.3), while CAMHB was  
114 supplemented with 2.5%~5.0% LHB for cultivation of *Streptococcus*.

115 Microdilution techniques were used to test the interactions between total  
116 flavonoids and other antibiotics. All these methods were developed for the detection  
117 of drug interactions, for there is no standardized method known to evaluate interaction  
118 between total flavonoids and antibiotics. Dilution procedures were performed  
119 according to CLSI protocol M7A7-2006(Adrar, Oukil & Bedjou, 2016).

120 Serial dilutions of total flavonoids and antibiotics were prepared, different  
121 combinations of these antibacterial were made and tested. Each well of the plate  
122 contain different concentrations of flavonoids and antibiotics which was shown in  
123 Table 1. The final volume in each well was equal to 100µL. The microtiter plates were  
124 incubated at 37°C for 16-18h.

125 The FICI was calculated to evaluate the combined antimicrobial effect of  
126 antibiotics and flavonoids:

$$\text{FICI} = \frac{\text{MIC of A in combination}}{\text{MIC of A alone}} + \frac{\text{MIC of B in combination}}{\text{MIC of B alone}}$$

127 In the present study, the combined antibacterial effects of antibiotics and  
128 flavonoids were synergistic effect, addition, indifferent effect or antagonistic effect  
129 when the results were  $\text{FICI} \leq 0.5$ ,  $0.5 < \text{FICI} \leq 1$ ,  $1 < \text{FICI} \leq 2$  and  $\text{FICI} > 2$ ,  
130 respectivel( Kurek, Nadkowska, Pliszka & Wolska, 2012).

### 131 **3. Results**

#### 132 *3.1 Antibacterial activities of total flavonoids on different drug-resistant bacteria*

133 The MIC values of total flavonoids on various bacteria isolated including gram  
134 positive bacteria and gram negative bacteria were shown in Table 2. The minimum  
135 inhibitory concentration of total flavonoids against *Acinetobacter Streptococcus* and  
136 *Acinetobacter baumannii* were 20mg/ml, that of *Enterococcus faecalis*, *Proteus*  
137 *vulgaris*, *Staphylococcus aureus* were 40mg/ml. The MIC values of total flavonoids  
138 on *E.coli* and *Pseudomonas aeruginosa* were 80mg/ml, showing antibacterial effects.

### 139 3.2 Antimicrobial activities of different combinations on gram negative bacteria

140 Antimicrobial activities of different combinations on gram negative bacteria are  
141 shown in Table 3. Drug sensitivity test showed that *E.coli*, *Pseudomonas aeruginosa*,  
142 *Proteus vulgaris*, *Acinetobacter baumannii* were all multidrug-resistant bacteria. The  
143 effect of tested combinations was evaluated by MIC and FICI.

144 As shown in Table 3, an additive effect is obtained against *E.coli* by using  
145 flavonoids with fosfomicin, florfenicol, mequindox, sulfamonomethoxine, a  
146 synergistic effect is obtained against *E.coli* by using the combination flavonoids with  
147 ceftiofur sodium, ceftazidime, cefotaxime sodium, lincomycin, amikacin, amoxicillin,  
148 an indifferent effect is shown by using flavonoids/azithromycin and  
149 flavonoids/rifampicin combination against *Escherichia coli*.

150 For *Pseudomonas. aeruginosa*, the combination of flavonoids and fosfomicin,  
151 meropenem shows synergistic effect, an indifferent effect is shown by using  
152 flavonoids and amoxicillin, florfenicol, rifampicin combination, while using  
153 flavonoids with azithromycin sulfamonomethoxine, lincomycin, mequindox,  
154 ceftriaxone sodium, cefotaxime sodium shows antagonistic effects.

155 To *Proteus vulgaris*, the combination of flavonoids and fosfomicin, ceftriaxone  
156 sodium, ceftiofur Sodium, cefotaxime sodium shows synergistic effect, showing  
157 indifferent with amoxicillin, colistin, mequindox, an antagonistic effect is obtained  
158 with the following combination of flavonoids with sulfamonomethoxine, lincomycin,  
159 florfenicol, azithromycin, amikacin, rifampicin, respectively.

160 For *Acinetobacter baumannii*, an additive effect is obtained by using flavonoids  
161 with sulfamonomethoxine, amoxicillin, mequindox, showing indifference with  
162 ceftriaxone sodium, cefotaxime sodium, ceftiofur Sodium, ceftazidime, lincomycin,  
163 Florfenicol, fosfomycin, meropenem.

### 164 3.3 Antimicrobial activities of different combinations on gram positive bacteria

165 Antimicrobial activities of different combinations on gram positive bacteria are  
166 shown in Table 4. Drug sensitivity test showed that *Enterococcus faecalis*,  
167 *Streptococcus*, *Staphylococcus aureus* were all multidrug-resistant bacteria. The effect  
168 of tested combinations was evaluated by MIC and FICI.

169 As shown in Table 4, an additive effect is obtained against *Enterococcus faecalis*  
170 by using flavonoids with amoxicillin, florfenicol, rifampicin, a synergistic effect  
171 shown in the combination of flavonoids with amikacin, ceftazidime, ceftiofur Sodium,  
172 cefotaxime sodium, meropenem, ceftriaxone sodium, showing indifference by using  
173 flavonoids with sulfamonomethoxine, and an antagonistic effect is obtained by using  
174 flavonoids with colistin, lincomycin and azithromycin.

175 For *Streptococcus*, the combination of flavonoids with fosfomycin, mequindox,  
176 colistin, sulfamonomethoxine show additive action, showing synergistic effect by  
177 using flavonoids/amikacin combination, an indifferent effect is obtained with the  
178 combination of flavonoids/florfenicol.

179 An additive effect is obtained against *Staphylococcus aureus* by using the  
180 combination of flavonoids and ceftriaxone sodium, amikacin, ceftazidime, lincomycin,  
181 showing synergistic effect with florfenicol, the combination of flavonoids and  
182 amoxicillin, fosfomycin show indifference. In another hand, an antagonistic effect is  
183 obtained with the combination of flavonoids and colistin, sulfamonomethoxine,  
184 mequindox, azithromycin.

## 185 4. Discussion

186 The most relevant result of this study is that it demonstrates total flavonoids of  
187 *Ilex rotunda Thunb.* are equally effective against the above 7 different  
188 multidrug-resistant bacteria. Furthermore, the combinations of flavonoids and  
189 different antimicrobial agents are also effective against those multidrug-resistant  
190 bacteria.

191 Multidrug resistance has become a serious problem in the world, an urgent need  
192 for research into novel antibacterial agent and the development of efficacious  
193 combinations against multidrug-resistant bacterial clinical isolates are becoming more  
194 and more important(Oliveira et al., 2017; Bisi-Johnson, Obi, Samuel, Eloff & Okoh,  
195 2017). Plant extracts used in combination with the antibiotic can be water extract,  
196 extracts of different solvents in different parts of plant or a serum containing plant  
197 extracts (Ahmad & Aqil, 2007). Compared with herbal medicine, antibiotics are easier  
198 to cause the problem of bacterial resistance due to their composition is clear and  
199 single while these herbal medicine own complex and varied composition (Schwarz,  
200 Kehrenberg & Walsh, 2001; Mishra, Rath, Swain, Ghosh, Das & Padhy, 2017).  
201 Medicinal plants have antibacterial action in vitro, enhance the antibiotic  
202 activity(Barreto et al., 2016), delay or eliminate bacterial tolerance(Roy-Leon, Lauzon,  
203 Toye, Singhal & Cameron, 2005), while because they contain a variety of effective  
204 ingredients which are not easy to be separated completely, so these medicinal plants  
205 cannot easily replace antibiotics. But the combined use of them and antibiotics may be  
206 the development trend of the clinical application of Chinese medicine.

207 In general, the target of antibiotics is single, but bacterial mutation is happening  
208 more and more, it is difficult to avoid the resistance mutations in bacteria(Schwarz,  
209 Kehrenberg & Walsh, 2001). One of TCM antibacterial characteristics is antibacterial  
210 ingredients are varied(Xiong, Li, Wang, Hong, Tang & Luo, 2013), which can inhibit  
211 or kill bacteria in different ways at the same time(Khan et al., 2015), so the choice of  
212 TCM combined with antibiotics can not only effect for a longer time, have a broad  
213 spectrum of antibacterial effect(Bisi-Johnson, Obi, Samuel, Eloff & Okoh, 2017d;  
214 Rajakumar, Gomathi, Thiruvengadam, Devi, Kalpana & Chung, 2017; Teanpaisan,



215 Kawsud, Pahumunto & Puripattanavong, 2017), but also can be used as inhibitors of  
216 multidrug resistance associated protein targets, promoting antibiotics play a better role,  
217 reducing the dosage of antibiotics, further reducing the possibility of bacterial  
218 resistance to antibiotics, and providing certain clinical medication safety the  
219 security(Eumkeb, Tanphonkrang, Sirichaiwetchakoon, Hengpratom & Naknarong,  
220 2017; Eumkeb, Siriwong & Thumanu, 2012; Eumkeb, Siriwong, Phitaktim,  
221 Rojtinnakorn & Sakdarat, 2012).

222 The experiment results proved that the total flavonoids of *Ilex rotunda Thunb.*  
223 combined with different antibacterial agents achieve a good effect, and screen  
224 combinations that can play a synergistic or additive inhibitory effect against different  
225 drug-resistant bacteria, providing a certain theoretical basis for the application and  
226 research and development of *Ilex rotunda Thunb.*

#### 227 **4 Conclusion**

228 In this study, the results demonstrate that different combinations of flavonoids  
229 and *Ilex rotunda Thunb.* are equally effective against 7 multidrug-resistant bacteria  
230 isolated. Analyses show that flavonoids in combination with other antimicrobials  
231 exhibit different effects (additive, synergistic, indifferent and antagonistic) against  
232 drug-resistant bacteria. This is probably due to different mechanisms of action  
233 involved in this case. Flavonoids extracted in *Ilex rotunda Thunb.* showed high  
234 antibacterial activities. The study of these combinations show additive or synergistic  
235 action against drug-resistant bacteria could be useful to predict the efficacy of drugs in  
236 clinical development phases.

#### 237 **5 Conflict of interest statement**

238 None of the authors of this paper have a financial or personal relationship with  
239 other people or organizations that could inappropriately influence or bias the content  
240 of the paper.

#### 241 **6 Acknowledgements**

242 The authors gratefully acknowledge the support by the National Science  
243 Foundation of China (31460675).

244

245 **References:**

246 Adrar, N., Oukil, N., & Bedjou, F. (2016). Antioxidant and antibacterial activities of *Thymus*  
247 *numidicus* and *Salvia officinalis* essential oils alone or in combination. *Industrial Crops and Products*,  
248 88, 112-119.

249 Ahmad, I., & Aqil, F. (2007). In vitro efficacy of bioactive extracts of 15 medicinal plants against  
250 ESbetaL-producing multidrug-resistant enteric bacteria. *Microbiological Research*, 162(3), 264-275.

251 Al-Alawi, R. A., Al-Mashiqri, J. H., Al-Nadabi, J., Al-Shihi, B. I., & Baqi, Y. (2017). Date Palm Tree  
252 (*Phoenix dactylifera* L.): Natural Products and Therapeutic Options. *Frontiers in Plant Science*, 8, 845.

253 Barbieri, R., Coppo, E., Marchese, A., Daglia, M., Sobarzo-Sanchez, E., Nabavi, S. F., & Nabavi, S. M.  
254 (2017). Phytochemicals for human disease: An update on plant-derived compounds antibacterial  
255 activity. *Microbiological Research*, 196, 44-68.

256 Barreto, H. M., Coelho, K. M., Ferreira, J. H., Dos, S. B., de Abreu, A. P., Coutinho, H. D., Da, S. R.,  
257 de Sousa, T. O., Cito, A. M., & Lopes, J. A. (2016). Enhancement of the antibiotic activity of  
258 aminoglycosides by extracts from *Anadenanthera colubrina* (Vell.) Brenan var. *cebil* against multi-drug  
259 resistant bacteria. *Natural Product Research*, 30(11), 1289-1292.

260 Bisi-Johnson, M. A., Obi, C. L., Samuel, B. B., Eloff, J. N., & Okoh, A. I. (2017a). Antibacterial  
261 activity of crude extracts of some South African medicinal plants against multidrug resistant etiological  
262 agents of diarrhoea. *BMC Complement Altern Med*, 17(1), 321.

263 Bisi-Johnson, M. A., Obi, C. L., Samuel, B. B., Eloff, J. N., & Okoh, A. I. (2017d). Antibacterial  
264 activity of crude extracts of some South African medicinal plants against multidrug resistant etiological  
265 agents of diarrhoea. *BMC Complement Altern Med*, 17(1), 321.

266 Eskandary, S., Tahmourespour, A., Hoodaji, M., & Abdollahi, A. (2017). The synergistic use of plant  
267 and isolated bacteria to clean up polycyclic aromatic hydrocarbons from contaminated soil. *J Environ*  
268 *Health Sci Eng*, 15, 12.

269 Eumkeb, G., Siritwong, S., Phitaktim, S., Rojtinnakorn, N., & Sakdarat, S. (2012). Synergistic activity  
270 and mode of action of flavonoids isolated from smaller galangal and amoxicillin combinations against  
271 amoxicillin-resistant *Escherichia coli*. *Journal of Applied Microbiology*, 112(1), 55-64.

272 Eumkeb, G., Siritwong, S., & Thumanu, K. (2012). Synergistic activity of luteolin and amoxicillin

- 273 combination against amoxicillin-resistant *Escherichia coli* and mode of action. *J Photochem Photobiol*  
274 *B*, 117, 247-253.
- 275 Eumkeb, G., Tanphonkrang, S., Sirichaiwetchakoon, K., Hengpratom, T., & Naknarong, W. (2017).  
276 The synergy effect of daidzein and genistein isolated from *Butea superba* Roxb. on the reproductive  
277 system of male mice. *Natural Product Research*, 31(6), 672-675.
- 278 Jones, M. E., Draghi, D. C., Thornsberry, C., Karlowsky, J. A., Sahm, D. F., & Wenzel, R. P. (2004).  
279 Emerging resistance among bacterial pathogens in the intensive care unit--a European and North  
280 American Surveillance study (2000-2002). *Ann Clin Microbiol Antimicrob*, 3, 14.
- 281 Khan, I., Ahmad, K., Khalil, A. T., Khan, J., Khan, Y. A., Saqib, M. S., Umar, M. N., & Ahmad, H.  
282 (2015). Evaluation of antileishmanial, antibacterial and brine shrimp cytotoxic potential of crude  
283 methanolic extract of Herb *Ocimum basilicum* (Lamiaceae). *Journal of Traditional Chinese Medicine*,  
284 35(3), 316-322.
- 285 Kurek, A., Nadkowska, P., Pliszka, S., & Wolska, K. I. (2012). Modulation of antibiotic resistance in  
286 bacterial pathogens by oleanolic acid and ursolic acid. *Phytomedicine*, 19(6), 515-519.
- 287 Liu, W., Peng, Y., Chen, H., Liu, X., Liang, J., & Sun, J. (2017). Triterpenoid Saponins with Potential  
288 Cytotoxic Activities from the Root Bark of *flex rotunda* Thunb. *Chemistry &*  
289 *Biodiversity*, 14(2), e1600209.
- 290 Liu, Y., Cheng, Y., Yang, H., Hu, L., Cheng, J., Ye, Y., & Li, J. (2017). Characterization of  
291 Extended-Spectrum beta-Lactamase Genes of *Shigella flexneri* Isolates With Fosfomycin Resistance  
292 From Patients in China. *Annals of Laboratory Medicine*, 37(5), 415-419.
- 293 Miravittles, M., & Anzueto, A. (2017). Chronic Respiratory Infection in Patients with Chronic  
294 Obstructive Pulmonary Disease: What Is the Role of Antibiotics? *International Journal of Molecular*  
295 *Sciences*, 18(7).
- 296 Mishra, M. P., Rath, S., Swain, S. S., Ghosh, G., Das, D., & Padhy, R. N. (2017). In vitro antibacterial  
297 activity of crude extracts of 9 selected medicinal plants against UTI causing MDR bacteria. *Journal of*  
298 *King Saud University - Science*, 29(1), 84-95.
- 299 Naz, R., Ayub, H., Nawaz, S., Islam, Z. U., Yasmin, T., Bano, A., Wakeel, A., Zia, S., & Roberts, T. H.  
300 (2017a). Antimicrobial activity, toxicity and anti-inflammatory potential of methanolic extracts of four  
301 ethnomedicinal plant species from Punjab, Pakistan. *BMC Complement Altern Med*, 17(1), 302.
- 302 Oliveira, F. S., Freitas, T. S., Cruz, R., Costa, M., Pereira, R., Quintans-Junior, L. J., Andrade, T. A.,  
303 Menezes, P., Sousa, B., Nunes, P. S., Serafini, M. R., Menezes, I., Araujo, A., & Coutinho, H. (2017).  
304 Evaluation of the antibacterial and modulatory potential of alpha-bisabolol, beta-cyclodextrin and  
305 alpha-bisabolol/beta-cyclodextrin complex. *Biomedicine & Pharmacotherapy*, 92, 1111-1118.

- 306 Rajakumar, G., Gomathi, T., Thiruvengadam, M., Devi, R. V., Kalpana, V. N., & Chung, I. M. (2017).  
307 Evaluation of anti-cholinesterase, antibacterial and cytotoxic activities of green synthesized silver  
308 nanoparticles using from *Millettia pinnata* flower extract. *Microb Pathog*, *103*, 123-128.
- 309 Ramezani, M., Rahmani, F., & Dehestani, A. (2017). Comparison between the effects of potassium  
310 phosphite and chitosan on changes in the concentration of Cucurbitacin E and on antibacterial  
311 property of *Cucumis sativus*. *BMC Complement Altern Med*, *17*(1), 295.
- 312 Roy-Leon, J. E., Lauzon, W. D., Toye, B., Singhal, N., & Cameron, D. W. (2005). In vitro and in vivo  
313 activity of combination antimicrobial agents on *Haemophilus ducreyi*. *J Antimicrob Chemother*,  
314 *56*(3), 552-558.
- 315 Santiago, C., Pang, E. L., Lim, K. H., Loh, H. S., & Ting, K. N. (2015). Inhibition of penicillin-binding  
316 protein 2a (PBP2a) in methicillin resistant *Staphylococcus aureus* (MRSA) by combination of  
317 ampicillin and a bioactive fraction from *Duabanga grandiflora*. *BMC Complement Altern Med*, *15*, 178.
- 318 Schwarz, S., Kehrenberg, C., & Walsh, T. R. (2001). Use of antimicrobial agents in veterinary  
319 medicine and food animal production. *Int J Antimicrob Agents*, *17*(6), 431-437.
- 320 Soudeiha, M., Dahdouh, E. A., Azar, E., Sarkis, D. K., & Daoud, Z. (2017). In vitro Evaluation of the  
321 Colistin-Carbapenem Combination in Clinical Isolates of *A. baumannii* Using the Checkerboard, Etest,  
322 and Time-Kill Curve Techniques. *Front Cell Infect Microbiol*, *7*, 209.
- 323 Teanpaisan, R., Kawsud, P., Pahumunto, N., & Puripattanavong, J. (2017). Screening for antibacterial  
324 and antibiofilm activity in Thai medicinal plant extracts against oral microorganisms. *J Tradit*  
325 *Complement Med*, *7*(2), 172-177.
- 326 Usman, A. M., Khurram, M., Khan, T. A., Faidah, H. S., Ullah, S. Z., Ur, R. S., Haseeb, A., Ilyas, M.,  
327 Ullah, N., Umar, K. S., & Iriti, M. (2016). Effects of Luteolin and Quercetin in Combination with  
328 Some Conventional Antibiotics against Methicillin-Resistant *Staphylococcus aureus*. *International*  
329 *Journal of Molecular Sciences*, *17*(11).
- 330 Wayne, P. (2014). CLSI. Performance Standards for Antimicrobial Susceptibility  
331 Testing; Twenty-Fourth Informational Supplement., *CLSI document M100-S24*: Clinical and  
332 Laboratory Standards Institute.
- 333 Xiong, J., Li, S., Wang, W., Hong, Y., Tang, K., & Luo, Q. (2013). Screening and identification of the  
334 antibacterial bioactive compounds from *Lonicera japonica* Thunb. leaves. *Food Chemistry*, *138*(1),  
335 327-333.
- 336 Ye, J., Cheng, H., Li, H., Yang, Y., Zhang, S., Rauf, A., Zhao, Q., & Ning, G. (2017). Highly  
337 synergistic antimicrobial activity of spherical and flower-like hierarchical titanium dioxide/silver  
338 composites. *J Colloid Interface Sci*, *504*, 448-456.

339 Zakaryan, H., Arabyan, E., Oo, A., & Zandi, K. (2017). Flavonoids: promising natural compounds  
340 against viral infections. *Archives of Virology*.

341 Zou, L., Lu, J., Wang, J., Ren, X., Zhang, L., Gao, Y., Rottenberg, M. E., & Holmgren, A. (2017).  
342 Synergistic antibacterial effect of silver and ebselen against multidrug-resistant Gram-negative  
343 bacterial infections. *EMBO Molecular Medicine*.

344

345

**Table1**

Microdilution technique used for the evaluation of combination effect on bacterial strain.

|   | 1                    | 2                     | 3                     | 4                    | 5                    | 6                    | 7                   | 8                   | 9                   | 10               | 11                | 12                |
|---|----------------------|-----------------------|-----------------------|----------------------|----------------------|----------------------|---------------------|---------------------|---------------------|------------------|-------------------|-------------------|
|   |                      | MIC <sub>B</sub> /256 | MIC <sub>B</sub> /128 | MIC <sub>B</sub> /64 | MIC <sub>B</sub> /32 | MIC <sub>B</sub> /16 | MIC <sub>B</sub> /8 | MIC <sub>B</sub> /4 | MIC <sub>B</sub> /2 | MIC <sub>B</sub> | 2MIC <sub>B</sub> | 4MIC <sub>B</sub> |
| A | 2MIC <sub>A</sub>    |                       |                       |                      |                      |                      |                     |                     |                     |                  |                   |                   |
| B | 1 MIC <sub>A</sub>   |                       |                       |                      |                      |                      |                     |                     |                     |                  |                   |                   |
| C | MIC <sub>A</sub> /2  |                       |                       |                      |                      |                      |                     |                     |                     |                  |                   |                   |
| D | MIC <sub>A</sub> /4  |                       |                       |                      |                      |                      |                     |                     |                     |                  |                   |                   |
| E | MIC <sub>A</sub> /8  |                       |                       |                      |                      |                      |                     |                     |                     |                  |                   |                   |
| F | MIC <sub>A</sub> /16 |                       |                       |                      |                      |                      |                     |                     |                     |                  |                   |                   |
| G | MIC <sub>A</sub> /32 |                       |                       |                      |                      |                      |                     |                     |                     |                  |                   |                   |
| H | No drug              |                       |                       |                      |                      |                      |                     |                     |                     |                  |                   |                   |

A: total flavonoids; B: antimicrobials.

The well H1 contains 100µl Mueller Hinton broth, 1µl bacterial inoculum, as the no-drug growth control.

Plate I : With the exception for H1 well, each well of the line H contains 25 µl of a dilution of total flavonoids, starting with a concentration of 2 times the MIC<sub>A</sub>, diluting from line A to line G.

Plate II : Apart from column 1, each well of the column contains 30µl of a dilution of the antimicrobial agent, starting with a concentration of 4 times the MIC<sub>B</sub>, diluting from column 12 to column 2.

Then remove 25µl of plate II from each well to be added to the corresponding plate I .

Last, all the 96 wells were added into 50µl bacterial inoculum.



**Table 2**

Minimum inhibitory concentrations (MICs; mg/mL) of total flavonoids from *Ilex Rotunda Thunb.*

| Bacteria                          | GRAM     | MIC |
|-----------------------------------|----------|-----|
| <i>Staphylococcus aureus</i> (R)  | Positive | 40  |
| <i>Streptococcus</i> (R)          | Positive | 20  |
| <i>Enterococcus faecalis</i> (R)  | Positive | 40  |
| <i>Pseudomonas aeruginosa</i> (R) | Negative | 80  |
| <i>Proteus vulgaris</i> (R)       | Negative | 40  |
| <i>Escherichia coli</i> (R)       | Negative | 80  |
| <i>Acinetobacter Bauman</i> (R)   | Negative | 20  |

R: resistant bacteria



**Table 3**

Minimum inhibitory concentrations (MICs;  $\mu\text{g/mL}$ ) of antibiotics alone or with total flavonoids from *Ilex Rotunda Thunb.* against gram negative bacteria.

| Bacteria                      | Drug               | Single MIC | Combination<br>MIC | FICI | Effect       |
|-------------------------------|--------------------|------------|--------------------|------|--------------|
| <i>Escherichia coli</i>       | Fosfomycin         | >3200      | 800                | 1.00 | Additive     |
|                               | Florfenicol        | 1280       | 80                 | 0.75 | Additive     |
|                               | Mequindox          | 100        | 6.25               | 0.57 | Additive     |
|                               | Sulfamonomethoxine | >3200      | 25                 | 0.51 | Additive     |
|                               | Ceftiofur Sodium   | 400        | 6.25               | 0.27 | Synergistic  |
|                               | Ceftazidime        | 800        | 50                 | 0.38 | Synergistic  |
|                               | Cefotaxime sodium  | 400        | 6.25               | 0.31 | Synergistic  |
|                               | Lincomycin         | 1600       | 12.5               | 0.31 | Synergistic  |
|                               | Amikacin           | >3200      | 25                 | 0.26 | Synergistic  |
|                               | Amoxicillin        | >3200      | 400                | 0.38 | Synergistic  |
|                               | Azithromycin       | 400        | >800               | 1.06 | Indifferent  |
|                               | Rifampicin         | 25         | 25                 | 1.25 | Indifferent  |
| <i>Pseudomonas aeruginosa</i> | Fosfomycin         | 400        | 100                | 0.31 | Synergistic  |
|                               | Meropenem          | 100        | 12.5               | 0.31 | Synergistic  |
|                               | Amoxicillin        | 3200       | 1600               | 1.25 | Indifferent  |
|                               | Florfenicol        | 320        | 320                | 1.02 | Indifferent  |
|                               | Rifampicin         | 100        | 100                | 1.25 | Indifferent  |
|                               | Azithromycin       | 400        | 800                | >2   | Antagonistic |
|                               | Sulfamonomethoxine | >3200      | 3200               | >2   | Antagonistic |
|                               | Lincomycin         | >3200      | >3200              | >2   | Antagonistic |

|                                |                    |       |      |      |              |
|--------------------------------|--------------------|-------|------|------|--------------|
|                                | Mequindox          | 400   | 800  | >2   | Antagonistic |
|                                | Ceftriaxone sodium | 50    | 100  | >2   | Antagonistic |
|                                | Cefotaxime sodium  | 50    | 100  | >2   | Antagonistic |
|                                | Ceftiofur Sodium   | 25    | 25   | >2   | Antagonistic |
|                                | Amikacin           | 50    | 100  | >2   | Antagonistic |
|                                | Ceftazidime        | 25    | 25   | >2   | Antagonistic |
| <i>Proteus vulgaris</i>        | Fosfomycin         | 3200  | 800  | 0.31 | Synergistic  |
|                                | Ceftriaxone sodium | 800   | 25   | 0.38 | Synergistic  |
|                                | Ceftiofur Sodium   | 800   | 12.5 | 0.31 | Synergistic  |
|                                | Cefotaxime sodium  | 800   | 50   | 0.38 | Synergistic  |
|                                | Amoxicillin        | >3200 | 1600 | 1.25 | Indifferent  |
|                                | Colistin           | 3200  | 1600 | 1.02 | Indifferent  |
|                                | Mequindox          | 50    | 50   | 1.06 | Indifferent  |
|                                | Sulfamonomethoxine | >3200 | 1600 | >2   | Antagonistic |
|                                | Lincomycin         | 1600  | 1600 | >2   | Antagonistic |
|                                | Florfenicol        | 160   | 80   | >2   | Antagonistic |
|                                | Azithromycin       | 200   | 400  | >2   | Antagonistic |
|                                | Amikacin           | 25    | 50   | >2   | Antagonistic |
|                                | Rifampicin         | 50    | 100  | >2   | Antagonistic |
| <i>Acinetobacter baumannii</i> | Sulfamonomethoxine | >3200 | 800  | 0.75 | Additive     |
|                                | Amoxicillin        | 3200  | 800  | 1.00 | Additive     |
|                                | Mequindox          | 25    | 6.25 | 0.51 | Additive     |
|                                | Ceftriaxone sodium | 100   | 100  | 1.25 | Indifferent  |
|                                | Cefotaxime sodium  | 200   | 400  | 1.25 | Indifferent  |

|                  |     |      |      |             |
|------------------|-----|------|------|-------------|
| Ceftiofur Sodium | 100 | 200  | 1.06 | Indifferent |
| Ceftazidime      | 800 | 1600 | 1.06 | Indifferent |
| Lincomycin       | 50  | 25   | 1.25 | Indifferent |
| Florfenicol      | 20  | 20   | 1.06 | Indifferent |
| Fosfomicin       | 50  | 25   | 1.06 | Indifferent |
| Meropenem        | 50  | 25   | 1.25 | Indifferent |

---

**Table 4**

Minimum inhibitory concentrations (MICs;  $\mu\text{g/mL}$ ) of antibiotics alone or with total flavonoids from *Ilex Rotunda Thunb.* against *gram positive bacteria*.

| Bacteria                         | Drug               | Single MIC | Combination<br>MIC | FICI | Effect       |
|----------------------------------|--------------------|------------|--------------------|------|--------------|
| <i>Enterococcus<br/>faecalis</i> | Amoxicillin        | 50         | 12.5               | 0.56 | Additive     |
|                                  | Florfenicol        | 160        | 40                 | 0.63 | Additive     |
|                                  | Rifampicin         | 25         | 6.25               | 1.00 | Additive     |
|                                  | Amikacin           | 1600       | 100                | 0.38 | Synergistic  |
|                                  | Ceftazidime        | 3200       | 12.5               | 0.19 | Synergistic  |
|                                  | Ceftiofur Sodium   | 1600       | <1.56              | 0.06 | Synergistic  |
|                                  | Cefotaxime sodium  | 1600       | 50                 | 0.26 | Synergistic  |
|                                  | Meropenem          | 400        | 3.125              | 0.31 | Synergistic  |
|                                  | Ceftriaxone sodium | 800        | 25                 | 0.13 | Synergistic  |
|                                  | Sulfamonomethoxine | >3200      | 3200               | 1.25 | Indifferent  |
|                                  | Colistin           | >3200      | >3200              | >2   | Antagonistic |
|                                  | Lincomycin         | 3200       | >3200              | >2   | Antagonistic |
|                                  | Azithromycin       | >3200      | >3200              | >2   | Antagonistic |
| <i>Streptococcus</i>             | Fosfomycin         | 25         | 0.78               | 0.75 | Additive     |
|                                  | Mequindox          | 100        | 12.5               | 0.56 | Additive     |
|                                  | Colistin           | 800        | 6.25               | 0.56 | Additive     |
|                                  | Sulfamonomethoxine | 3200       | 400                | 1.00 | Additive     |
|                                  | Amikacin           | 400        | 3.125              | 0.31 | Synergistic  |
|                                  | Florfenicol        | 80         | 40                 | 1.25 | Indifferent  |
| <i>Staphylococcus</i>            | Ceftriaxone sodium | 100        | 1.56               | 0.56 | Additive     |

|               |                    |       |       |      |              |
|---------------|--------------------|-------|-------|------|--------------|
| <i>aureus</i> | Amikacin           | 50    | 6.25  | 0.75 | Additive     |
|               | Ceftazidime        | 100   | 6.25  | 0.56 | Additive     |
|               | Lincomycin         | 50    | 3.125 | 0.75 | Additive     |
|               | Florfenicol        | 20    | 2.5   | 0.50 | Synergistic  |
|               | Amoxicillin        | 200   | 200   | 1.25 | Indifferent  |
|               | Fosfomycin         | 50    | 25    | 1.06 | Indifferent  |
|               | Colistin           | 1600  | 800   | >2   | Antagonistic |
|               | Sulfamonomethoxine | >3200 | 1600  | >2   | Antagonistic |
|               | Mequindox          | 25    | 50    | >2   | Antagonistic |
|               | Azithromycin       | 25    | 50    | >2   | Antagonistic |

---
